# Supplementary material
Source: PubMed Central journal article supplement (PMC3048896)
Supplement: NIHMS273910-supplement-1_si_001.pdf [file NIHMS273910-supplement-1_si_001.pdf]

## Supporting Information

**Supplementary Figure 1.** Observed rate of  $E_{\text{theo}}$  as a function of theophylline concentration. For each theophylline concentration, the reaction was sampled at 0, 5, 10, 20, 30, 60, 120, and 180 min, the fraction reacted was determined by PAGE, and these data were fit to the equation:  $F_t = F_{\text{max}} (1 - e^{-k_{\text{obs}} t})$ , where  $F_t$  is the fraction reacted at time  $t$  and  $F_{\text{max}}$  is the maximum extent. Values for  $k_{\text{obs}}$  were fit to a saturation plot:  $k_{\text{obs}} = k_{\text{cat}} [\text{theo}] / (K_d + [\text{theo}])$ , which gave a  $k_{\text{cat}}$  of  $0.055 \text{ min}^{-1}$  and  $K_d$  of  $160 \text{ }\mu\text{M}$  ( $r = 0.993$ ). Reaction conditions:  $5 \text{ }\mu\text{M}$   $E_{\text{theo}}$ ,  $0.5 \text{ }\mu\text{M}$  each of  $A_1$  and  $A_2\text{-B}$ ,  $25 \text{ mM}$   $\text{MgCl}_2$ , pH 8.5,  $42 \text{ }^\circ\text{C}$ .

**Supplementary Figure 2.** Quantitative, isothermal, ligand-dependent exponential amplification in the presence of 10% deproteinized serum. (a) The yield of E (and E') was monitored over time in the presence of 0 (purple), 5 (blue), 10 (cyan), 20 (green), 50 (yellow), 100 (orange), or 200 (red)  $\mu\text{M}$  theophylline. These data were fit to the equation:  $[E] = a / (1 + be^{-ct})$ , where  $a$  is the final extent,  $b$  is the degree of sigmoidicity, and  $c$  is the exponential growth rate. A threshold (dashed line) was set at  $0.14 \text{ }\mu\text{M}$  E, corresponding to 25% of the maximum extent of amplification. Inset shows each amplification profile as it crossed the threshold. Amplification profiles for 2 and  $500 \text{ }\mu\text{M}$  theophylline are omitted for clarity. (b) Time to threshold as a function of the concentration of  $E_0$ , which reflects the concentration of theophylline. Linear regression coefficient was 0.997.

**Supplementary Figure 3.** Exponential amplification initiated by  $E_0$  in a reaction mixture that also contained:  $5 \text{ }\mu\text{M}$   $E_{\text{theo}}$  and no theophylline (blue),  $5 \text{ }\mu\text{M}$   $E_{\text{theo}}$  and  $1 \text{ mM}$  theophylline (green), or  $0.5 \text{ }\mu\text{M}$  each of  $A_1$  and  $A_2\text{-B}$  and no theophylline (red). Reaction conditions:  $2 \text{ }\mu\text{M}$  each of A, A', B, and B',  $25 \text{ mM}$   $\text{MgCl}_2$ , pH 8.5,  $42 \text{ }^\circ\text{C}$ .

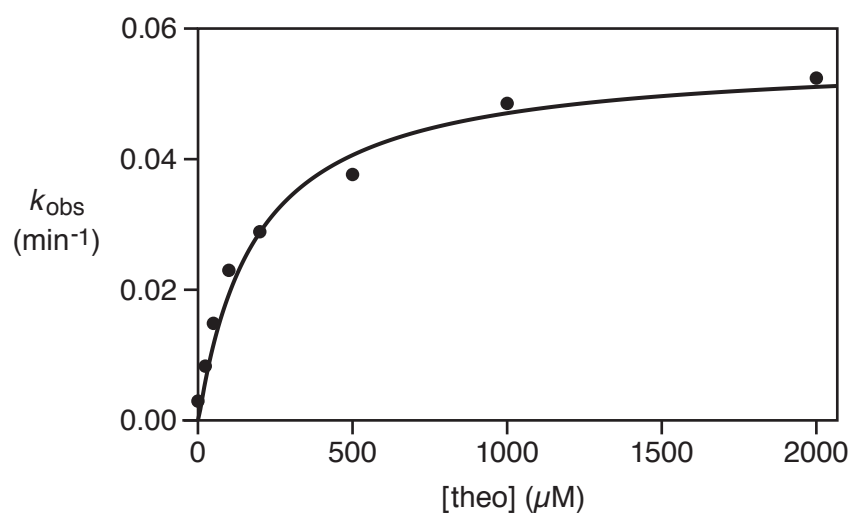

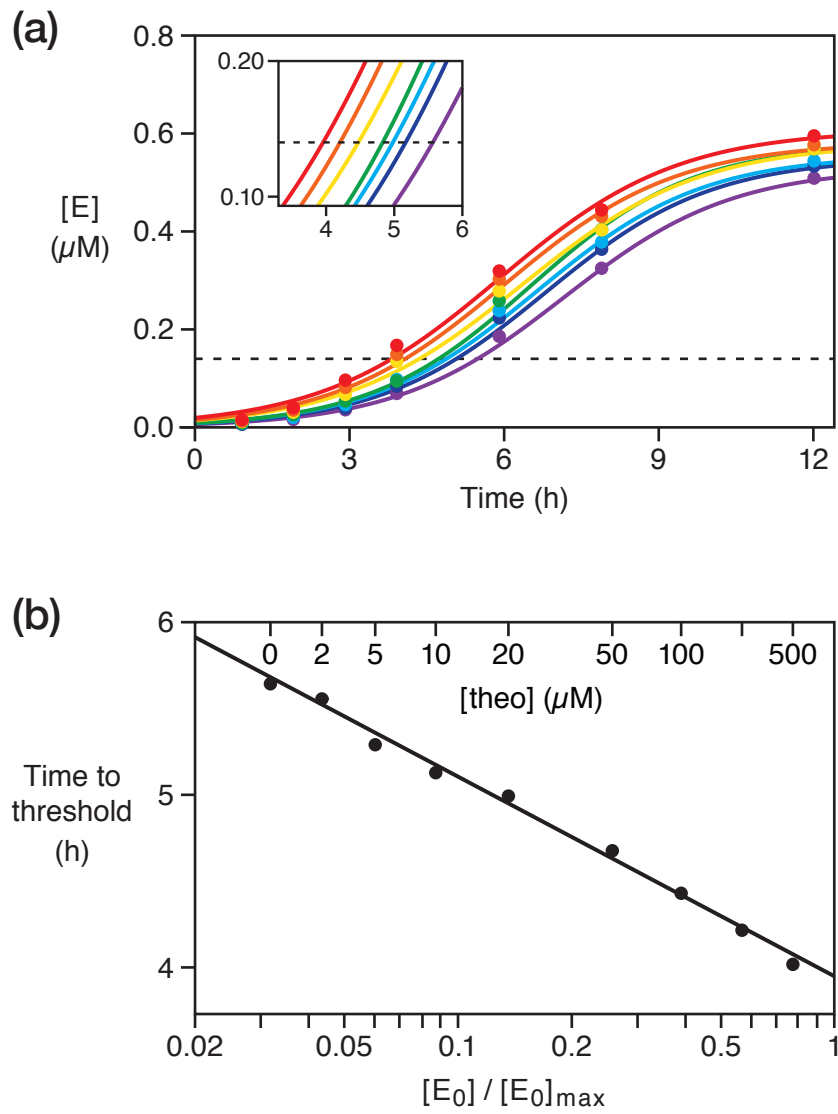

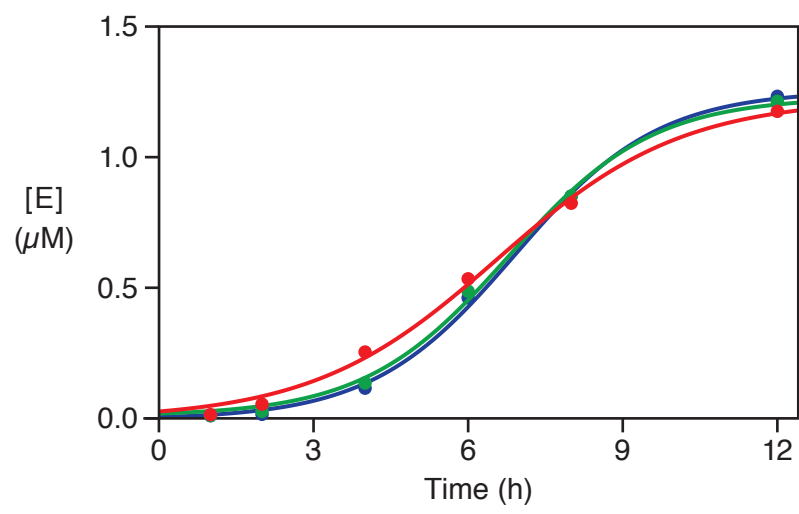

**Supplementary Table 1.** Spontaneous Initiation of Cross-replication by A, B, A', and B'<sup>a</sup>

| A•A' pairing | [A], [B], [A'], [B']<br>( $\mu$ M) | exp. growth rate<br>(h <sup>-1</sup> ) | maximum extent<br>( $\mu$ M) | time to threshold <sup>b</sup><br>(h) |
|--------------|------------------------------------|----------------------------------------|------------------------------|---------------------------------------|
| GAAU•GUUU    | 5 <sup>c</sup>                     | 1.17                                   | 3.29                         | 1.96                                  |
| GAU•GUU      | 5 <sup>c</sup>                     | 0.68                                   | 3.04                         | 4.18                                  |
| GAU•GUU      | 5                                  | 0.77                                   | 3.22                         | 3.27                                  |
| GAU•GUU      | 4                                  | 0.62                                   | 2.76                         | 3.63                                  |
| GAU•GUU      | 3                                  | 0.56                                   | 2.09                         | 4.24                                  |
| GAU•GUU      | 2                                  | 0.52                                   | 1.34                         | 5.52                                  |
| GAU•GUU      | 1                                  | 0.45                                   | 0.62                         | 8.61                                  |

<sup>a</sup> Reaction conditions: 25 mM MgCl<sub>2</sub>, pH 8.5, 42 °C. <sup>b</sup> Time to threshold is the time required to reach 25% of maximum extent. <sup>c</sup> B and B' substrates were prepared using the standard T7 promoter and did not contain a self-cleaving hammerhead ribozyme at the 3' end.
